# Supplementary material for: The Relationship of 25(OH)D3 with Diabetes Mellitus and the Mediation Effect of Lipid Profile in Chinese Rural Population of Henan Province
Source: MDPI journal article supplement (doi:10.3390/medicina58010085), 2022-01-06
Supplement: s1 [file s1]

## Supplementary Materials

**Table S1.** The Comparison of serum lipid characteristics under different 25(OH)D<sub>3</sub> levels.

| Variable   | vitamin D<br>deficiency and<br>insufficiency<br>(N=1725) | vitamin D<br>sufficiency<br>(N= 601) | $\chi^2$ -value | <i>p</i> |
|------------|----------------------------------------------------------|--------------------------------------|-----------------|----------|
| High TC    | 4.71%                                                    | 5.99%                                | 1.53            | 0.217    |
| High TG    | 21.76%                                                   | 16.95%                               | 6.28            | 0.012*   |
| Low HDL-C  | 30.08%                                                   | 13.29%                               | 65.76           | <0.001*  |
| High LDL-C | 2.57%                                                    | 2.97%                                | 0.27            | 0.604    |

OR (odds ratio). CI (confidence interval). TC (total cholesterol). TG (triglyceride). HDL-C (high-density lipoprotein cholesterol). LDL-C (low-density lipoprotein cholesterol); Data are presented as percentage of each category. \*  $p < 0.05$  was considered statistically significant.

**Table S2.** The Comparison of the prevalence of T2DM in different serum lipid levels.

| Parameter    | Event(T2DM)<br>(N=395) | No event<br>(N=1931) | $\chi^2$ -value | <i>p</i> |
|--------------|------------------------|----------------------|-----------------|----------|
| <b>TC</b>    |                        |                      | 4.22            | 0.040*   |
| Low TC       | 16.6%                  | 83.4%                |                 |          |
| High TC      | 23.9%                  | 76.1%                |                 |          |
| <b>TG</b>    |                        |                      | 54.54           | <0.001*  |
| Low TG       | 14.1%                  | 85.9%                |                 |          |
| High TG      | 28.3%                  | 71.7%                |                 |          |
| <b>HDL-C</b> |                        |                      | 8.64            | 0.003*   |
| High HDL-C   | 15.6%                  | 84.4%                |                 |          |
| Low HDL-C    | 20.9%                  | 79.1%                |                 |          |
| <b>LDL-C</b> |                        |                      | 1.13            | 0.289    |
| Low LDL-C    | 17.1%                  | 82.9%                |                 |          |
| High LDL-C   | 11.9%                  | 88.1%                |                 |          |

OR (odds ratio). CI (confidence interval). TC (total cholesterol). TG (triglyceride). HDL-C (high-density lipoprotein cholesterol). LDL-C (low-density lipoprotein cholesterol); Data are presented as percentage of each category. \*  $p < 0.05$  was considered statistically significant.
